Development 140, 481 (2013) doi:10.1242/dev.092395  
© 2013. Published by The Company of Biologists Ltd

## Neural tube patterning by Ephrin, FGF and Notch signaling relays

**Alberto Stolfi, Eileen Wagner, J. Matthew Taliaferro, Seemay Chou and Michael Levine**

There was an error published in *Development* **138**, 5429-5439.

On p. 5431, PIPES-sucrose-FA buffer was incorrectly described. The correct composition of this buffer is: 400 mM sucrose, 50 mM EGTA, 100 mM PIPES pH 7, 4% formaldehyde.

The authors apologise to readers for this mistake.
